# Supplementary material for: Archimedes
Source: Oxford University Press journal article supplement (doi:10.2337/diacare.26.11.3093), 2003-11-01
Supplement: 3093-sup-onlineappendixdc0249.doc [file 3093-sup-onlineappendixdc0249.doc]

Appendix

This appendix describes the variables, equations, sources of data, and assumptions of the part of the Archimedes model that represents the pathophysiology of diabetes. The letters *a - f* represent positive numbers, and are different for each equation.

| **No.** | **Equations** | **Sources** | **Notes** |
| --- | --- | --- | --- |
| [1] |  | Error: Reference source not found Error: Reference source not found | [[1]](#footnote-2) |
|  | - “The occurrence and progression of type 1 diabetes (*DF1)* is determined by a person’s age, sex, race/ethnicity, and family history.” |  |  |
| [2] |  | Error: Reference source not found Error: Reference source not found | [[2]](#footnote-3) |
|  | - “The occurrence and progression of type 2 diabetes (*DF2* ) is determined by a person’s age, sex, race/ethnicity, body mass index (*RBMI(BMI)),* and whether they have impaired glucose tolerance (*IGT)*.” |  |  |
| [3] |  | Error: Reference source not found Error: Reference source not found Error: Reference source not found | [[3]](#footnote-4) |
|  | - “The greater a person’s BMI, the greater the risk.” |  |  |
| [4] |  | Error: Reference source not found | [[4]](#footnote-5) |
|  | - “Some people have virtually no impairment in glucose tolerance; they are very unlikely to get diabetes. Some people have very poor glucose tolerance; they have about twice the risk of getting diabetes, all else equal.” |  |  |
| [5] |  | defined | [[5]](#footnote-6) |
|  | - “A person’s fasting plasma glucose (*FPG(t))* is determined by their basal hepatic glucose production (*FPG0(t)*), their insulin level (*I*), and the efficiency with which insulin affects liver production of glucose and uptake of glucose by the muscle and fat (*E*).” |  |  |
| [6] |  | defined | [[6]](#footnote-7) |
|  | - “In turn, a person’s basal glucose production, *FPG0(t)*,is determined by the basal production in people who do not have diabetes, *G(t),* and the degree of insulin resistance in a person with diabetes (*H*). Insulin resistance gets worse as the disease progresses, *H(DF2*).” |  |  |
| [7] |  | Error: Reference source not found Error: Reference source not found | [[7]](#footnote-8) |
|  | - “The degree of insulin resistance is a function of the severity of the diabetes, and is related to the efficiency with which the liver, muscle and fat respond to insulin.” |  |  |
| [8] |  | Error: Reference source not found | [[8]](#footnote-9) |
|  | - “In people who do not have diabetes, their basal hepatic production of glucose, *G(t),* gradually increases with age (*t*).” |  |  |
|  |  | Error: Reference source not found |  |
|  | - “The basal hepatic production varies across individuals, and the degree of the spread is different for different ages.” |  |  |
| [9] |  | Error: Reference source not found | Error: Reference source not found [[9]](#footnote-10) [[10]](#footnote-11) |
|  | - “For people with type 1 diabetes, the insulin level, *I*, decreases as the severity of the disease (*DF1*) increases. For people with type 2 diabetes, the insulin level is determined by the efficiency with which their organs respond to insulin (*E*), and to the degree of insulin resistance (*H*). Both of those worsen with increasing severity of the disease (*DF2*).” |  |  |
| [10] |  | Error: Reference source not found | [[11]](#footnote-12) |
|  | - “The efficiency, *E*, with which insulin affects hepatic glucose production and fat uptake by muscle and fat decreases as the severity of type 2 diabetes (*DF2*) increases.” |  |  |
| [11] |  | Error: Reference source not found Error: Reference source not found Error: Reference source not found | [[12]](#footnote-13) |
|  | - “On average, HbA1c is a linear function of a person’s FPG.” |  |  |
| [12] |  | Error: Reference source not found | [[13]](#footnote-14) |
|  | - “Randomly measured plasma glucose (*RPG*) is a function of a person’s FPG, with a lot of uncertainty (Δ*RPG*).” |  |  |
| [13] |  | Error: Reference source not found Error: Reference source not found | [[14]](#footnote-15) |
|  | - “[While the minute-to-minute glucose level after a glucose load changes rapidly], a person’s 2-hour value can be predicted from their FPG, age (*t*), BMI, systolic blood pressure (*SBP*) and triglyceride level (*TRI*), within known degrees of variability (*VAROGT*).” |  |  |
| [14] |  | Error: Reference source not found |  |
|  | - “The effect of diabetes on blood pressure, *DiabBP*, varies for different individuals.” |  |  |
| [15] | , | Error: Reference source not found Error: Reference source not found | [[15]](#footnote-16) |
|  | - The test for FPG is imperfect and can be affected by both systematic and random factors.” |  |  |
| [16] |  | Error: Reference source not found | [[16]](#footnote-17) [[17]](#footnote-18) |
|  | - “The intensity of a person’s thirst (*Thirst*) caused by diabetes is a function of their FPG, and varies from time to time (*x*).” |  |  |
| [17] |  | Error: Reference source not found | [[18]](#footnote-19) |
|  | - “The probability of particular person will seek care for thirst (*TH*) is a function of the chance an average person with that FPG will seek care (*MeanSymthirst*), modified by that particular person’s “thirst propensity” (σ*thirst*). |  |  |
| [18] |  | Error: Reference source not found |  |
|  | - “The fraction of people who seek care for symptoms at various levels of FPG can be estimated from existing data.” |  |  |
| [19] |  | Error: Reference source not found Error: Reference source not found | [[19]](#footnote-20) |
|  | - ‘The occurrence of diabetic ketoacidotic events (*DKAtime*) is a function of a person’s “natural” (untreated) insulin level (*Iuntreated*), in the absence of treatment.” |  |  |
| [20] |  | Error: Reference source not found Error: Reference source not found | Error: Reference source not found |
|  | - ‘The probability of a moderate or severe hypoglycemic event (*HypoGlyRate*) is a function of the fractional change in a person’s insulin level (*Fract*Δ*insulin*). The greater the proportional drop, the greater the chance of an event.” |  |  |
| [21] |  | Error: Reference source not found Error: Reference source not found Error: Reference source not found Error: Reference source not found Error: Reference source not found |  |
|  | - “Interventions such as diet and drugs have different mechanisms of actions (see the text). The degrees to which various treatments and combinations affect their various targets (*DietDrugRxFactor*) are functions of a person’s FPG before treatment is given (*FPG(RxAge)),* and can be estimated from available data.” |  |  |

1. Race/ethnicity and sex are included through the values of the parameters *a, b, c, d, e*, and *f*. Their values for various combinations of sex and race (e.g. Blacks (M&F), Asian Americans (M&F),), Native Americans, Hispanic Americans (M&F), and Whites (M&F)), were estimated from data in Diabetes in America (16). The equation is scaled so that a person first begins to develop symptoms when *DF*1 = 1. ξ1 is drawn from a uniform distribution on the interval (0, 1), hereinafter denoted as U[0, 1]. Drawing ξ1 from U[0, 1] will cause the individuals in a large population (of a particular race/ethnicity/sex) to get type 1 diabetes at rates that match the observed age-specific incidence rates for that population, while allowing every individual to have a unique history of diabetes, including never getting type 1 diabetes. The variable *famhis* registers the effect of family history, as estimated from the listed sources. [↑](#footnote-ref-2)
2. See note 1. *IGT* and *RBMI* are described in the next two equations. [↑](#footnote-ref-3)
3. *RBMI* is the relative risk associated with BMI, and is a continuous function of a person’s BMI. [↑](#footnote-ref-4)
4. ξ3 is drawn from U[0, 1]. [↑](#footnote-ref-5)
5. *I* is scaled such that *I* = 1 for a person who does not have type 1 diabetes. *E* is scaled such that *E* = 1 for a person who does not have type 2 diabetes. [↑](#footnote-ref-6)
6. The effect of *H* is to make the liver produce more glucose at the beginning of the disease. This then gets counteracted by increased production of insulin, which decreases hepatic production of glucose. Over time a relative deficiency of insulin causes *FPG0* to climb. [↑](#footnote-ref-7)
7. Our conceptualization for this equation is a relative deficiency of insulin, due to a combination of increasing resistance of the liver to the effects of insulin, plus a decrease in amount of insulin produced by the pancreas due to a mechanism like beta cell fatigue. However, the steady-state equations shown here do not distinguish between the two mechanisms, and the success of this equation in the validations does not document the correctness of any specific hypothesis about their relative importance. [↑](#footnote-ref-8)
8. The available data source included people with diabetes. The denominator of this equation corrects for that fact. [↑](#footnote-ref-9)
9. Derivation of this equation assumes the following: average FPG in people without diabetes is 90mg/dL [12]; in studies cited in Diabetes in America, a person’s FPG at time of diagnosis exceeds 140mg/dL; average age of diagnosis of Type 1 diabetes is 15 years; average time from onset of type 1 diabetes to reaching renal threshold (350mg/dL), if untreated, is 1 year. Results are not sensitive to these assumptions within reasonable ranges. [↑](#footnote-ref-10)
10. This equation addresses the steady state, which is appropriate for simulating long-term trials. To calculate hour-to-hour fluctuations of insulin levels, as a function of short-term changes in glucose levels, a more detailed equation is needed. [↑](#footnote-ref-11)
11. Assumes the average FPG in the control group of the UKPDS is the FPG of an average person with diabetes, on conservative management. [↑](#footnote-ref-12)
12. The coefficients are different for type 1 and type 2 diabetes. [↑](#footnote-ref-13)
13. Δ *RPG* = N[a, b], a normal distribution with mean = a and standard deviation = b. [↑](#footnote-ref-14)
14. Although this equation does not describe the minute-by-minute changes in OGTT after a glucose load, it is suitable for simulating long-term trials, such as those used in the validation exercises (Error: Reference source not found). [↑](#footnote-ref-15)
15. The coefficient “*a*” denotes the systematic error. The coefficient “*b*” represents the random error. Values for *a* and *b* are specific to each test, and are estimated from the indicated sources. [↑](#footnote-ref-16)
16. Similar formulas give the chance a person will seek care for other symptoms (polyuria, fatigue and blurred vision). The equations will cause people to seek care for some symptom at rates that match observed rates. However we know of no data on the proportion of people who seek care for *particular* symptoms (e.g. thirst versus blurred vision). [↑](#footnote-ref-17)
17. SDthirst is assumed to be 0.2. The validations are not sensitive to this assumption over a range (0, 0.6). [↑](#footnote-ref-18)
18. σthirst is a person’s “thirst propensity” and is distributed N[0, *SD*thirst] [↑](#footnote-ref-19)
19. Assumes Poisson arrival times. [↑](#footnote-ref-20)
